RESEARCH ARTICLE

# Health-related quality of life and associated factors among primary caregivers of children with cerebral palsy, in Bahir Dar and Gondar cities, Ethiopia, 2022

Tesfa Kassa , Hiruy Tadese, Getachew Azeze Eriku , Yohannes Abich , Molla Fentanew

Department of Physiotherapy, School of Medicine, College of Medicine and Health Science, University of Gondar Comprehensive Specialized Hospital, Gondar, Ethiopia

\* [tesfaphysio2001@gmail.com](mailto:tesfaphysio2001@gmail.com)

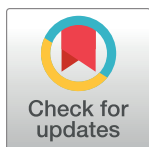

## Abstract

### Background

Caring for a child with cerebral palsy (CP) could negatively affect the Health-Related Quality of Life (HRQOL) of the mothers who are usually the primary caregivers. To the best of our 'knowledge, there is a dearth of information on the HRQOL of primary caregivers of children with CP in Ethiopia. Therefore, this study aimed to investigate caregivers' HRQOL and factors associated with it in Gondar and Bahir Dar Cities, Northwest Ethiopia, 2022.

### Methods

A community-based cross-sectional study was conducted among primary caregivers of Children with CP from April 20 to June 20, 2022, in Gondar and Bahir Dar cities. Convenience sampling was used to get study participants. Data were collected by trained health extension and community-based rehabilitation workers. The collected data were coded, cleaned, entered into EPI data, and exported to Stata-16 for analysis. A generalized linear model was employed to show the relationship between dependent and independent variables. A P-value  $\leq 0.05$  was considered statistically significant at a 95% confidence interval.

### Result

In this study, HRQOL among primary caregivers of children with CP was 28.72( $\pm 13.38$ ) and 23.26( $\pm 12.37$ ) in the physical summary score (PSC) and mental summary score (MSC) respectively. Age 17-30 years ( $p$ -value = 0.03), unable to read and write ( $p$  = 0.01), privately employed ( $p$  = 0.01) and government employed ( $p$  = 0.02), monthly income <1000 Ethiopian Birr (ETB) ( $p$  = 0.01), insufficient sleeping ( $p$  = 0.001), others relationship ( $p$  = 0.001), have three and above children ( $p$  = 0.001), others house composition ( $p$  = 0.003), have no helpers ( $p$  = 0.001) and third birth order of child ( $p$  = 0.03) were all factors associated with HRQOL in PSC. On the other hand, income <1000 ETB ( $p$  = 0.05), insufficient sleeping ( $p$  = 0.001), others in relation to the child ( $p$  = 0.001), others in house composition ( $p$  = 0.03), dyskinetic CP

## OPEN ACCESS

**Citation:** Kassa T, Tadese H, Eriku GA, Abich Y, Fentanew M (2024) Health-related quality of life and associated factors among primary caregivers of children with cerebral palsy, in Bahir Dar and Gondar cities, Ethiopia, 2022. PLoS ONE 19(4): e0301050. <https://doi.org/10.1371/journal.pone.0301050>

**Editor:** Shegaw Tesfa Mengist, Wolkite University, ETHIOPIA

**Received:** June 21, 2023

**Accepted:** March 10, 2024

**Published:** April 30, 2024

**Peer Review History:** PLOS recognizes the benefits of transparency in the peer review process; therefore, we enable the publication of all of the content of peer review and author responses alongside final, published articles. The editorial history of this article is available here: <https://doi.org/10.1371/journal.pone.0301050>

**Copyright:** © 2024 Kassa et al. This is an open access article distributed under the terms of the [Creative Commons Attribution License](https://creativecommons.org/licenses/by/4.0/), which permits unrestricted use, distribution, and reproduction in any medium, provided the original author and source are credited.

**Data Availability Statement:** All relevant data are within the paper and its [supporting information](#) files.

**Funding:** The author(s) received no specific funding for this work.

**Competing interests:** The authors have declared that no competing interests exist.

( $p = 0.01$ ) and ataxic CP ( $p = 0.001$ ) were all factors associated with HRQOL of caregivers in MSC components.

## Conclusion

The HRQOL among primary caregivers of children with CP in Bahir Dar and Gondar cities was low. Age, monthly income, educational status, sleeping status, relationship and house composition, number of living children, birth order of child, helpers, and type of CP were all significantly associated with HRQOL of primary caregivers of children with CP.

## Introduction

Constraints caused by Cerebral palsy (CP) includes motor dysfunction which is a hallmark of CP, speaking, intellectual and emotional problems [1–3]. It leads to dysfunction in self-care and make these children with CP dependent on others for their activities of daily living [4]. Those problems can result in demands and requirements for long-term care [5]. The role of the primary caregiver is essential in helping disabled individuals [6,7]. Because children with disabilities require more care, and their parents suffer more stress in taking care of them [8]. Taking care of these children, especially those who require special and long-term support, results in physical and mental stress for mothers [9,10].

The empirical evidence suggests that there is a wide variation in how caregivers adapt to the specific demands of care [11]. There are three aspects of circumstances that can cause stress and burden, which are characteristics of the affected person, the caregiver's characteristics, and contextual factors. Those are important to understand the influence of these variables on the physical and mental health of the caregivers [9,12].

There is evidence to support the fact that the HRQOL of caregivers of children with CP influence the health outcome of the children with CP [13,14]. Caring for children with CP has a direct impact on caregivers' lives and changes the caregiver's normal routines [15].

As previously published studies there are many factors associated with HRQOL of caregivers of children with CP. Among these age [16], educational status [16–18], occupation [19], monthly income [18,20,21], insufficient sleeping status [18], and relationship with child [21] were factors associated with HRQOL among primary caregivers.

Accordingly, caregivers HRQOL and the factors affecting it should be studied thoroughly to improve the care provided and the outcomes of children with CP and their families. Many factors interact together to shape the effect on the HRQOL of caregivers. To the best of our knowledge, there is a paucity of evidence on HRQOL among primary caregivers of children with CP in Ethiopia. Therefore, this study aimed to investigate the HRQOL and associated factors among primary caregivers of children with CP in Bahir Dar and Gondar cities, Northwest Ethiopia.

## Methods and materials

### Study design, period, and area

A community-based cross-sectional study was conducted to assess HRQOL and possible associated factors among primary caregivers of children with CP. The study studied from February to July 2022 and reported based on STROBE recommendations. The study was approved by ethical review committee of school of medicine and health science at University of Gondar,

Ethiopia. Written informed consent were obtained from each participants and thumb impression were used participants who cannot read and write. This study was conducted in Bahir Dar and Gondar cities. Bahir Dar is the capital city of Amhara's national regional state, located in the northwestern part of Ethiopia, at 565 km away from Addis Ababa. Gondar is located in the Amhara regional state, 738 km North West of Addis Ababa.

### Subjects and sampling technique

All primary caregivers of children with CP who lived in Bahir Dar and Gondar cities were the source population. Whereas, all primary caregivers of children with CP who lived in Bahir Dar and Gondar cities during the data collection period were the study population of the study. Participants aged 15 and above, both gender, and caregivers who care 6 month and above were included to the study. However, participants having a history of psychological disorders, antidepressant and anxiolytic drugs users, and caregivers with hearing and speech problems were excluded.

The study participants of this study were recruited by using a convenience sampling technique. Finally, with convenience sampling techniques 324 study participants were included in the study.

### Data collection tools and procedures

Primary Caregivers is the ones who spend most of the time with children with CP. The caregiver could be mothers, fathers, sisters, brothers, relatives, and employed workers. HRQOL of primary caregivers with CP was measured through **RAND** Short Form-36 (SF-36) health survey version 1.0 questionnaire. The scoring was demonstrated using norm-based scoring which is 50 as considered average; below 50 is considered below average and anything above 50 is considered above average. Therefore, lower scores in each dimension or summary score (physical component summary score and mental component summary score) are showing of poorer health-related quality of life in those domains and vice versa [22]. In addition to this, The Gross Motor Function Classification System (GMFCS), a 5-level classification system, were used to determine the severity levels of gross motor function of children and youth with CP.

The data were collected through face-to-face interviews by structured questionnaires, which has socio-demographic characteristics of caregivers (age, sex, marital status, level of education, occupation, monthly income, number of living children, relationship with the child, house composition, presence of an assistant, and sleeping status), socio-demographic and clinical characteristics of the child (sex, age, types of CP, type of CP based on involved body part, Type of disability, and severity level based on GMFCS), and RAND SF-36 health survey version 1.0 to determine health-related quality of life of primary caregivers. The questionnaire was first translated into Amharic language for data collection and translated back to English by a language expert. Health extension and community-based rehabilitation workers were the data collectors.

HRQOL of caregivers was assessed using the RAND SF-36 health survey version 1.0 questionnaire. The tool comprises 36 items classified with eight scales of domains. It includes Physical Functioning (PF), Role limitation due to Physical health problems (RP), Bodily Pain (BP), Role limitations due to Emotional problems (EP), General Health perception (GH), Social Functioning (SF), Vitality (VT) and Mental Health (MH). The scoring has two steps. Initially, pre-coded numeric values were recoded per the scoring manual. Second, items on the same scale were averaged together to make the scores. The higher the scores, the better the HRQOL. Finally, the tool sums up into two separate summary scores, which are physical summary score (PSC) and mental summary score (MSC) [23]. The validity and reliability of the tools have been demonstrated in Ethiopia [24].

## Data quality control and analysis

Prior to data collection, one-day training was provided for data collectors regarding the questionnaire of the study. The training was delivered by the principal investigators (HT and TK). Pre-tested were applied to around 5% of the total sample size of the study, which was performed at Debre Tabor referral hospital. Based on the finding of a pre-test the consistency and clarity of the questionnaire were checked. Furthermore, prior to data analysis, the principal investigator checked the completeness of the collected data.

The collected data were coded, entered into EPI data, and exported to STATA version 16 for analysis. Descriptive analysis such as frequency, percent, and mean (SD) of statistical findings was analyzed. A generalized linear model (GLM) with gamma family and link function was used to identify factors associated with HR-QOL. This model is able to handle large class errors of distributions. Variance inflation factor ( $VIF < 10$ ) was used to check multi-collinearity effect with independent factors. Independent factors with a 95% confidence level and P-value less than 0.05 in the final model were considered statistically significant and presented with an Adjusted Odds Ratio (AOR) with 95% CI.

## Ethical considerations

Ethical approval and clearance were obtained from the school of medicine ethical review committee (Ref.No: 470/04/2020) at University of Gondar College of medicine and health sciences.

Informed consent was obtained from each participant and the purposes and the importance of the study were explained to them. The Participant's involvement in this study was voluntary and participants who were unwilling to participate in the study have the right withdrawal at any stage of the interview. Confidentiality was kept at all levels of the study. To ensure this, during data collection the study participants were identified using codes and unauthorized persons had no access to the collected data. The information that might expose the identity of the study participants was not collected. Computerized data were access only by principal investigator.

## Result

### Socio-demographic characteristics and other related factors of primary caregiver of children with cerebral palsy patients

A total of 324 primary caregivers of children with cerebral palsy in Gondar and Bahir Dar cities were participated in the study. Majority of primary caregivers were mothers 285(88%) and 121 (62.7%) of caregivers do not have assistant or helper from family members to take care of their child with CP. The mean ages of caregivers were 35.4 years ( $\pm 21.12$ ) and only 6.8% of the participants have good sleeping status. Caregivers who have two children and did not perform regular exercise were 43.3% and 96.9% respectively ([Table 1](#)).

### Socio-demographic and clinical characteristics of children with cerebral palsy patients

Of the total, 66.7% of children with CP were male, among them 45.1% were the first child in the family with a mean age of 4.78 years ( $SD = 2.75$ ). Regarding CP type, the majority of them were spastic (26.9%) followed by mixed type (25.0%). Multiple types of disability and physical disability in the type of disability were mostly experienced by participants 172(53.1%) and 110 (34%) respectively ([Table 2](#)).

Table 1. Socio-demographic characteristics and other related factors of primary caregiver of children with cerebral palsy (n = 324) in 2022.

| Variables                                                                        |                          | Frequency | Percentage (%) | Mean(SD)   |
|----------------------------------------------------------------------------------|--------------------------|-----------|----------------|------------|
| Age                                                                              | 17–30 years              | 126       | 38.9           |            |
|                                                                                  | 31–40 years              | 129       | 39.8           |            |
|                                                                                  | 41–50 years              | 57        | 17.6           |            |
|                                                                                  | 51 and above years       | 12        | 3.7            |            |
| Gender                                                                           | Male                     | 39        | 12             |            |
|                                                                                  | Female                   | 285       | 88             |            |
| Marital status                                                                   | Single                   | 30        | 9.3            |            |
|                                                                                  | Married                  | 91        | 28.1           |            |
|                                                                                  | Divorced                 | 156       | 48.1           |            |
|                                                                                  | Widowed                  | 47        | 14.5           |            |
| Educational level                                                                | Unable to read and write | 150       | 46.3           |            |
|                                                                                  | Able to read and write   | 52        | 16             |            |
|                                                                                  | Primary school           | 24        | 7.4            |            |
|                                                                                  | Secondary school         | 45        | 13.9           |            |
|                                                                                  | Diploma/degree and above | 53        | 16.4           |            |
| Occupation                                                                       | Farmer                   | 76        | 23.5           |            |
|                                                                                  | Merchant                 | 19        | 5.9            |            |
|                                                                                  | Daily laborer            | 137       | 42.3           |            |
|                                                                                  | Private employed         | 44        | 13.6           |            |
|                                                                                  | Governmental employed    | 34        | 10.5           |            |
|                                                                                  | Other specific           | 14        | 4.3            |            |
| Monthly income                                                                   | <1000 ETB                | 168       | 51.9           |            |
|                                                                                  | 1000–4000 ETB            | 150       | 46.3           |            |
|                                                                                  | >4000 ETB                | 6         | 1.9            |            |
| Location of the participant                                                      | Gondar town              | 218       | 67.3           |            |
|                                                                                  | Bahir Dar town           | 106       | 32.7           |            |
| Sleeping status                                                                  | Good                     | 22        | 6.8            |            |
|                                                                                  | Bad                      | 302       | 93.2           |            |
| What is your relationship with the child                                         | Mother                   | 285       | 88             |            |
|                                                                                  | Father                   | 26        | 8              |            |
|                                                                                  | Other specific           | 13        | 4              |            |
| Number of living children                                                        | One                      | 87        | 26.9           |            |
|                                                                                  | Two                      | 140       | 43.2           |            |
|                                                                                  | Three and above          | 97        | 29.9           |            |
| What is your household composition?                                              | Two parents together     | 90        | 27.8           |            |
|                                                                                  | Single mother            | 211       | 65.1           |            |
|                                                                                  | Single father            | 16        | 4.9            |            |
|                                                                                  | Others specific          | 7         | 2.2            |            |
| Do you have an assistant or helper from your family members for a child with CP? | Yes                      | 121       | 37.3           |            |
|                                                                                  | No                       | 203       | 62.7           |            |
| If yes, who mostly helps you?                                                    | Husband                  | 42        | 32.3           |            |
|                                                                                  | Wife                     | 14        | 10.8           |            |
|                                                                                  | Daughter                 | 40        | 30.8           |            |
|                                                                                  | Son                      | 6         | 4.6            |            |
|                                                                                  | Other specific           | 28        | 21.5           |            |
| Time devoted to diurnal childcare(Hours per day)                                 |                          |           |                | 21.30±5.31 |

(Continued)

Table 1. (Continued)

| Variables        |     | Frequency | Percentage (%) | Mean(SD) |
|------------------|-----|-----------|----------------|----------|
| Regular exercise | Yes | 10        | 3.1            |          |
|                  | No  | 314       | 96.9           |          |

<https://doi.org/10.1371/journal.pone.0301050.t001>

## Health-related quality of life among primary caregivers of children with CP

Out of the eight scales domains, physical functioning (50.09) and bodily pain (32.31) were the highest. Whereas, role limitation due to physical health (2.55) was the lowest. Moreover, PSC ( $28.72 \pm 13.38$ ) score was higher than MSC ( $23.26 \pm 12.37$ ).

The PSC and the MSC domains of HRQOL (skewness = 1.88 and kurtosis = 5.70) and (skewness = 1.51 and kurtosis = 4.93) had skewed distribution respectively.

## Factors associated with HRQOL among primary caregivers of children with CP patients

GLM was fitted to identify factors associated with HRQOL among primary caregivers of children with CP. Within this, we fitted two models comprising PSC (model 1) and MSC (model 2) as dependent variables.

**Factors associated with Physical summary score.** In the case of a model 1, around ten factors are associated with the Physical summary score. Seventeen to thirty years ( $\exp(b): 1.31$ ,  $p\text{-value} = 0.028$ ) and 31–40 years ( $\exp(b): 1.28$ ,  $p\text{-value} = 0.035$ ) in the age of primary caregivers showed 31% and 28% times less HRQOL than 51 and above years old. Moreover, those unable to read and write ( $\exp(b): 0.75$ ,  $p\text{-value} = 0.001$ ) and secondary school ( $\exp(b): 0.80$ ,  $p\text{-value} = 0.014$ ) caregivers reported 25% and 20% poor HRQOL than those who had a diploma and above (Table 3).

**Factors associated with mental summary score.** In the case of a model 2, around five variables are associated with mental summary scores these are low-paid monthly income, insufficient sleeping status, relationships with the child, house composition, and type of CP. Caregivers who paid <1000 ( $\exp(b): 0.65$ ;  $P\text{-value} = 0.046$ ) had 35% less HRQOL than those who paid >4000 ETB. Likewise, caregivers who have paid 1000–4000 ETB ( $\exp(b): 0.66$ ;  $p\text{-value} = 0.045$ ) had 34% less HRQOL than those who paid > 4000ETB.

Primary caregiver participants who had insufficient sleeping status ( $\exp(b): 0.57$ ;  $p\text{-value} = 0.000$ ) had 43% less HRQOL than those who had sufficient sleep status. Moreover, others in caregivers relationship other than mothers and fathers ( $\exp(b): 0.47$ ;  $p\text{-value} = 0.000$ ) were 53% less HRQOL than mothers (Table 4).

## Discussion

The main findings of this study were investigated through RAND SF-36 health survey version 1.0, which has eight domains. The scores range from the lowest physical health (2.55) to the highest score of physical functioning (50.09). PSC (28.72) was higher than MSC (23.26). Moreover, monthly income, sleeping status, house composition, and relationship with the child were associated factors with both PSC and MSC.

This study tried to investigate HRQOL among primary caregivers of children with cerebral palsy that was found that all of the eight scales were low. Particularly, role limitation due to physical health problems and role limitation due to emotional problems had the lowest scores. Our study, was higher than studies conducted in a rehabilitation center Khartoum-Sudan (overall 8.8) [19] and Ghana (median summary total score was 12.5) [25]. The plausible

Table 2. Socio-demographic and clinical characteristics of children with cerebral palsy (n = 324) in 2022.

| Variables                              |                       | Frequency | Percentage (%) | Mean(SD)  |
|----------------------------------------|-----------------------|-----------|----------------|-----------|
| Age (years)                            |                       |           |                | 1.33±0.47 |
| Sex                                    | Male                  | 216       | 66.7           |           |
|                                        | Female                | 108       | 33.3           |           |
| Birth order                            | First                 | 146       | 45.1           |           |
|                                        | Second                | 98        | 30.2           |           |
|                                        | Third                 | 58        | 17.9           |           |
|                                        | Fourth                | 22        | 6.8            |           |
| Type of CP                             | Spastic               | 87        | 26.9           |           |
|                                        | Athetoid              | 45        | 13.9           |           |
|                                        | Ataxic                | 65        | 20.1           |           |
|                                        | Hypotonic             | 46        | 14.2           |           |
|                                        | Mixed                 | 81        | 25.0           |           |
| Type of CP based on involved body part | Monoplegic            | 4         | 1.2            |           |
|                                        | Hemiplegic            | 74        | 22.8           |           |
|                                        | Diplegic              | 81        | 25.0           |           |
|                                        | Tetraplegic           | 165       | 50.9           |           |
| Severity level (GMFCS)                 | Stage 1               | 30        | 9.3            |           |
|                                        | Stage 2               | 80        | 24.7           |           |
|                                        | Stage 3               | 153       | 47.2           |           |
|                                        | Stage 4               | 59        | 18.2           |           |
|                                        | Stage 5               | 2         | 6              |           |
| Type of disability                     | Physical              | 110       | 34.0           |           |
|                                        | Intellectual/learning | 34        | 10.5           |           |
|                                        | Hearing               | 4         | 1.2            |           |
|                                        | Vision                | 4         | 1.2            |           |
|                                        | Multiple              | 172       | 53.1           |           |

<https://doi.org/10.1371/journal.pone.0301050.t002>

explanation could be that studies studied in those areas were used with small sample sizes. For example, a study in a rehabilitation center Khartoum-Sudan was conducted on 65 caregivers and in Ghana on 76 caregivers of participants. Beyond sample size differences, a study conducted in Ghana used a Pediatric Quality of Life Inventory Family Impact Module to determine caregivers' quality of life.

In contrast, this study is lower than studies conducted at Selcuk University Medical Faculty (PSC; 55.8 and MSC: 52.31 scores) [26] and Edirne [27] in Turkey, Shanghai (PSC; 52.57 and MSC; 31.58) [21] and Anhui province of (PSC; 49.39 and MSC; 41.65) [16] in China, South Indian (mean mental HRQOL = 40.73 and mean score for physical HRQOL = 44.52) [20], Malaysia with a total impact score of 81.9 [18], and Brazil [28]. The possible explanation could be that those studies have different in characteristics of the participants, living standards of caregivers, and the quality of the service for CWD. For instance, in Shanghai China participants were recruited from the study who had well-organized rehabilitation services and governmental supported area for children with disabilities (CWD) and have higher standard living style.

Regarding factors associated with HRQOL on both PSC and MSC models were identified in this study. Caregivers who had less monthly income (<1000 and 1000–4000 ETB) had less HRQOL than caregivers who have paid >4000 ETB. Increased income could enhance the physical environment for parents who are caring for children and boost access to health



Table 3. Factors associated with PSC in generalized linear model analysis (n = 324).

| Variables                               |                          | Exp(b) | 95% CI    | P-value      |
|-----------------------------------------|--------------------------|--------|-----------|--------------|
| Age                                     | 17–30 years              | 1.31   | 1.03–1.66 | <b>0.028</b> |
|                                         | 31–40 years              | 1.28   | 1.02–1.62 | <b>0.035</b> |
|                                         | 41–50 years              | 1.19   | .94–1.51  | 0.157        |
|                                         | 51 and above             | ref    | ref       | ref          |
| Sex                                     | Male                     | 1.02   | 0.88–1.18 | 0.83         |
|                                         | Female                   | ref    | ref       | ref          |
| Marital status                          | Single                   | 0.96   | .79–1.18  | 0.720        |
|                                         | Married                  | ref    | ref       | ref          |
|                                         | Divorced                 | 0.99   | .86–1.14  | 0.916        |
|                                         | Widowed                  | 0.98   | .83–1.16  | 0.821        |
| Educational level                       | Unable to write and read | 0.75   | 0.64–0.88 | <b>0.001</b> |
|                                         | Able to read and write   | 0.86   | 0.73–1.02 | 0.087        |
|                                         | Primary school           | 0.87   | 0.72–1.06 | 0.171        |
|                                         | Secondary school         | 0.80   | 0.68–0.96 | <b>0.014</b> |
|                                         | Diploma and above        | ref    | ref       | ref          |
| Occupation                              | Farmer                   | ref    | ref       | ref          |
|                                         | Merchant                 | 1.01   | 0.84–1.21 | 0.08         |
|                                         | Daily laborer            | 0.89   | 0.78–1.01 | 0.082        |
|                                         | Private employed         | 0.79   | 0.67–0.94 | <b>0.007</b> |
|                                         | Governmental employed    | 0.78   | 0.63–0.96 | <b>0.019</b> |
|                                         | Others*                  | 1.14   | 0.88–1.47 | 0.311        |
| Monthly income                          | <1000 ETB                | 0.60   | 0.42–0.84 | <b>0.003</b> |
|                                         | 1000–4000 ETB            | 0.68   | 0.49–0.95 | <b>0.024</b> |
|                                         | >4000 ETB                | ref    | ref       | ref          |
| Sleeping status                         | Good (sufficient)        | ref    | ref       | ref          |
|                                         | Bad (insufficient)       | 0.72   | 0.61–0.86 | <b>0.000</b> |
| Relationship with the child             | Mother                   | ref    | ref       | ref          |
|                                         | Father                   | 1.08   | 0.90–1.29 | 0.435        |
|                                         | Others**                 | 0.51   | 0.37–0.71 | <b>0.000</b> |
| Number of living children               | One                      | ref    | ref       | ref          |
|                                         | Two                      | 0.91   | 0.81–1.03 | 0.129        |
|                                         | Three and above          | 0.82   | 0.73–0.92 | <b>0.001</b> |
| House composition                       | Two parents              | ref    | ref       | ref          |
|                                         | Mother only              | 0.98   | 0.85–1.12 | 0.749        |
|                                         | Father only              | 0.89   | 0.70–1.14 | 0.366        |
|                                         | Others***                | 1.88   | 1.23–2.88 | <b>0.003</b> |
| Do you have helpers from family members | Yes                      | ref    | ref       | ref          |
|                                         | No                       | 0.82   | 0.75–0.91 | <b>0.000</b> |
| Regular physical exercise               | Yes                      | ref    | ref       | ref          |
|                                         | No                       | 1.00   | 0.78–1.29 | 0.995        |
| Birth order                             | One                      | ref    | ref       | ref          |
|                                         | Two                      | 1.06   | 0.96–1.17 | 0.273        |
|                                         | Three                    | 1.14   | 1.01–1.29 | <b>0.032</b> |
|                                         | Four                     | 1.02   | 0.87–1.21 | 0.788        |

(Continued)



Table 3. (Continued)

| Variables          |              | Exp(b) | 95% CI    | P-value |
|--------------------|--------------|--------|-----------|---------|
| Type of CP         | Spastic      | ref    | ref       | ref     |
|                    | Dyskinetic   | 1.09   | 0.95–1.24 | 0.206   |
|                    | Ataxic       | 1.08   | 0.96–1.22 | 0.183   |
|                    | Hypotonic    | 1.03   | 0.90–1.17 | 0.691   |
|                    | Mixed        | 0.98   | 0.88–1.10 | 0.776   |
| Severity in GMFCS  | I            | 1.46   | 0.84–2.51 | 0.178   |
|                    | II           | 1.47   | 0.85–2.53 | 0.164   |
|                    | III          | 1.40   | 0.82–2.40 | 0.224   |
|                    | IV           | 1.25   | 0.72–2.16 | 0.430   |
|                    | V            | ref    | ref       | ref     |
| Type of disability | Physical     | ref    | ref       | ref     |
|                    | Intellectual | 0.89   | 0.77–1.03 | 0.126   |
|                    | Hearing      | 0.81   | 0.57–1.15 | 0.236   |
|                    | Vision       | 1.26   | 0.86–1.84 | 0.237   |
|                    | Mixed        | 0.96   | 0.88–1.05 | 0.337   |

\* = (students and housemaid)

\*\* = (sisters, brothers, employed workers), and

\*\*\* = (aunt, ankle, grandmother).

<https://doi.org/10.1371/journal.pone.0301050.t003>

services. As a result, this might give stable psychological and emotional feelings for caregivers. This study is supported by studies conducted in the Sarlahi and Rautahat Districts of Nepal [20,21] and Shanghai, China [21]. However, a study conducted in Malaysia reported that primary caregivers who have earned high monthly income had lower HRQOL than those who earned a low family monthly income.

Moreover, caregivers who had an insufficient sleeping status showed a significantly reduced HRQOL than caregivers who had a sufficient sleeping status. According to Elsayed and colleagues, children with CP experience sleeping issues more frequently than children with typical development [29]. Similarly, as reported by Wayte and colleagues, there had a strong connection between maternal depression and the child's sleep problems [30]. This study also agreed with a study studied in Malaysia showed that insufficient or a problem in sleeping status had a less HRQOL of primary caregivers than those who had sufficient sleeping status [18].

Likewise, caregivers' relationships with children of others (sister, brother, and employed care workers) had less HRQOL than mothers of the child on both physical and mental HRQOL. Furthermore, caregivers' house composition of others (sister, brothers, aunts, ankles, grandmother) found lower HRQOL than those who had parents (both mothers and fathers) on both summary scores. On the other hand, 17–30 years, and 31–40 years old primary caregivers had 31% and 28% higher lower HRQOL than those who are 50 and above years old primary caregivers in physical summary scores respectively. The plausible explanation might be that being young age had highly vulnerable to fast fatigable tendency than the older age group to care children's with cerebral palsy. On contrary, a study conducted in Tehran, Iran found that older age had poor HRQOL than the younger age group.

Another predictor associated with HRQOL were the educational status of caregivers. Being unable to read and write and secondary school of primary caregivers were 25% and 20% less HRQOL than those diploma and above caregivers in physical HRQOL respectively. The possible explanation might be that well-educated primary caregivers are believed to have a higher

Table 4. Factors associated with MSC in generalized linear model analysis (n = 324).

| Variables                               |                          | Exp(b) | 95% CI    | P-value      |
|-----------------------------------------|--------------------------|--------|-----------|--------------|
| Marital status                          | Single                   | 0.86   | 0.67–1.09 | 0.220        |
|                                         | Married                  | ref    | ref       | ref          |
|                                         | Divorced                 | 0.90   | 0.75–1.06 | 0.228        |
|                                         | Widowed                  | 1.01   | 0.82–1.24 | 0.928        |
| Educational level                       | Unable to write and read | 0.92   | 0.75–1.11 | 0.352        |
|                                         | Able to read and write   | 1.06   | 0.86–1.29 | 0.623        |
|                                         | Primary school           | 0.83   | 0.65–1.04 | 0.097        |
|                                         | Secondary school         | 0.93   | 0.73–1.10 | 0.298        |
|                                         | Diploma and above        | ref    | ref       | ref          |
| Occupation                              | Farmer                   | ref    | ref       | ref          |
|                                         | Merchant                 | 1.01   | 0.85–1.16 | 0.931        |
|                                         | Daily laborer            | 0.99   | 0.83–1.24 | 0.942        |
|                                         | Private employed         | 1.01   | 0.69–1.14 | 0.894        |
|                                         | Governmental employed    | 0.88   | 0.76–1.43 | 0.346        |
|                                         | Others*                  | 1.04   | 0.79–1.50 | 0.789        |
| Monthly income                          | <1000 ETB                | 0.65   | 0.43–0.99 | <b>0.046</b> |
|                                         | 1000–4000 ETB            | 0.66   | 0.44–0.99 | <b>0.045</b> |
|                                         | >4000 ETB                | ref    | ref       | ref          |
| Sleeping status                         | Good (sufficient)        | ref    | ref       | ref          |
|                                         | Bad (insufficient)       | 0.57   | 0.46–0.71 | <b>0.000</b> |
| Relationship with the child             | Mother                   | ref    | ref       | ref          |
|                                         | Father                   | 0.87   | 0.71–1.05 | 0.152        |
|                                         | Others                   | 0.47   | 0.32–0.70 | <b>0.000</b> |
| House composition                       | Two parents              | ref    | ref       | ref          |
|                                         | Mother only              | 0.94   | 0.78–1.11 | 0.451        |
|                                         | Father only              | 0.91   | 0.67–1.23 | 0.543        |
|                                         | Others**                 | 1.76   | 1.05–2.94 | <b>0.032</b> |
| Time devoted(hours per day)             |                          | 0.99   | 0.98–1.01 | 0.569        |
| Do you have helpers from family members | Yes                      | ref    | ref       | ref          |
|                                         | No                       | 0.89   | 0.79–1.00 | 0.060        |
| Physical exercise                       | Yes                      | ref    | ref       | ref          |
|                                         | No                       | 1.03   | 0.76–1.41 | 0.791        |
| Birth order                             | One                      | ref    | ref       | ref          |
|                                         | Two                      | 0.97   | 0.86–1.08 | 0.526        |
|                                         | Three                    | 1.06   | 0.90–1.18 | 0.640        |
|                                         | Four                     | 0.97   | 0.80–1.17 | 0.731        |
| Type of CP                              | Spastic                  | ref    | ref       | ref          |
|                                         | Dyskinetic               | 1.25   | 1.06–1.48 | <b>0.005</b> |
|                                         | Ataxic                   | 1.31   | 1.13–1.51 | <b>0.000</b> |
|                                         | Hypotonic                | 1.17   | 0.99–1.35 | 0.070        |
|                                         | Mixed                    | 1.06   | 0.92–1.20 | 0.444        |

(Continued)

Table 4. (Continued)

| Variables         |     | Exp(b) | 95% CI    | P-value |
|-------------------|-----|--------|-----------|---------|
| Severity in GMFCS | I   | 1.77   | 0.96–3.29 | 0.069   |
|                   | II  | 1.82   | 0.98–3.36 | 0.056   |
|                   | III | 1.75   | 0.95–3.21 | 0.072   |
|                   | IV  | 1.35   | 0.73–2.53 | 0.337   |
|                   | V   | ref    | ref       | ref     |

\* = (students and housemaid) and

\*\* = (sisters, brothers, employed workers).

<https://doi.org/10.1371/journal.pone.0301050.t004>

socioeconomic status. For this reason, caregivers who achieved up their educational status to diploma and above could have better HRQOL. The finding of this study is consistent with the studies conducted at Kelantan, Johor and Sarawak states in Malaysia [18], Anhui province of China [16], and Tehran, Iran [17]. Similarly, governmental and private employed primary caregivers had found poor HRQOL than farmers in physical HRQOL. This study agreed with a study done in Tehran, Iran [17]. They were reported that being unemployed had poor HRQOL than employed caregivers.

Being third birth order of a child had 14% reduced HRQOL of primary caregivers than those who are first birth order children in physical HRQOL. The result of this study is consistent with a study conducted in Shanghai, China [21]. On the other hand, primary caregivers who have three and above numbers of children had 18% less HRQOL than those who have a child in physical HRQOL. This might be due to the fact, caregivers need economical support and helpers to care for their children. So, as the number of children increases in a house, it may create an additional burden regarding caring them for primary caregivers.

Primary caregivers who had not an assistant or helper from the family members showed 18% less HRQOL than those who have an assistant or helpers in physical HRQOL. The plausible explanation is that when there are more family members, caregivers can receive physical and emotional support from other family members. Moreover, caregivers experience less psychological stress. This finding is agreed with a study studied in Shanghai, China [21].

According to Surender S and his colleagues, when compared to children with unilateral spastic CP, children with dyskinetic and bilateral spastic CP had lower HRQOL ratings, which is likely a result of the severity of the motor impairment in both conditions [31]. However, in our study, children with dyskinetic and ataxic types of CP had 25% and 31% less HRQOL of primary caregivers than those of children who had a spastic type of CP in mental HRQOL respectively.

The limitation of this study is lack of generalizability to all caregivers of children with CP because the study used a survey sampling method to recruit the study participants. In addition to this, the study focused only on two regional cities due to this caregivers who lived in rural areas were not addressed. Moreover, the cross-sectional nature of the study design does not show a causal-effect relationship of the possible associated factors with HRQOL.

## Conclusion

The HRQOL among primary caregivers of children with CP in the study area was low. Age, monthly income, educational status, sleeping status, relationship and house composition, number of living children, birth order of child, helpers, and type of CP were all significantly associated with HRQOL of primary caregivers of children with CP. Likewise, monthly income, sleeping status, relationship with child, and house composition were all significantly associated

factors for both PSC and MSC domains of HRQOL of primary caregivers. Therefore, giving attentions to these factors affecting the HRQOL of primary caregivers of cerebral palsy will be necessary to improve the HRQOL of the caregivers.

## Supporting information

**S1 Checklist.** *PLOS ONE* clinical studies checklist.  
(DOCX)

**S1 Dataset.**  
(ZIP)

## Author Contributions

**Conceptualization:** Tesfa Kassa, Hiruy Tadese.

**Data curation:** Tesfa Kassa.

**Formal analysis:** Tesfa Kassa, Hiruy Tadese.

**Methodology:** Tesfa Kassa, Hiruy Tadese, Getachew Azeze Eriku, Yohannes Abich, Molla Fentanew.

**Software:** Tesfa Kassa, Hiruy Tadese, Getachew Azeze Eriku, Molla Fentanew.

**Supervision:** Tesfa Kassa, Getachew Azeze Eriku, Yohannes Abich, Molla Fentanew.

**Validation:** Tesfa Kassa.

**Writing – original draft:** Tesfa Kassa, Hiruy Tadese, Molla Fentanew.

**Writing – review & editing:** Tesfa Kassa, Getachew Azeze Eriku, Yohannes Abich, Molla Fentanew.

## References

1. Hayat AA, Alvi T, Farhan S, Sami W, Meny AH. Medical and psychiatric comorbidity in the patients with intellectual disability in a rehabilitation setting, Kingdom of Saudi Arabia. *ACADEMIC JOURNAL*. 2022.
2. Vuong A. Quantifying the Relationships Among Selective Motor Control, Brain Imaging, Biomechanics and Physical Therapy in Children with Spastic Bilateral Cerebral Palsy: University of California, Los Angeles; 2022.
3. Sawyer S. Hand-Arm Bilateral Intensive Training Compared to Constraint Induced Movement Therapy for Improving Bimanual Performance and Quality of Life in Children with Unilateral Spastic Cerebral Palsy: A Meta-Analysis: California State University, Fresno; 2022.
4. Janssen-Potten YJ, Roks L, Roijen R, Vermeulen RJ, Group AS, Rameckers EE. Effectiveness of functional intensive therapy on mobility and self-care activities in children and adolescents with cerebral palsy—a prospective clinical study. *Disabil Rehabil*. 2022;1–10. <https://doi.org/10.1080/09638288.2022.2130445> PMID: 36226733
5. Gardiner E, Iarocci G. Unhappy (and happy) in their own way: A developmental psychopathology perspective on quality of life for families living with developmental disability with and without autism. *Research in developmental disabilities*. 2012; 33(6):2177–92. <https://doi.org/10.1016/j.ridd.2012.06.014> PMID: 22789702
6. Snyder B, Keefe K. The unmet needs of family caregivers for frail and disabled adults. *Social Work in Health Care*. 1985; 10(3):1–14. [https://doi.org/10.1300/J010v10n03\\_01](https://doi.org/10.1300/J010v10n03_01) PMID: 3158088
7. Plank A, Mazzoni V, Cavada L. Becoming a caregiver: new family carers' experience during the transition from hospital to home. *Journal of Clinical Nursing*. 2012; 21(13–14):2072–82. <https://doi.org/10.1111/j.1365-2702.2011.04025.x> PMID: 22672464
8. Masulani-Mwale C, Mathanga D, Silungwe D, Kauye F, Gladstone M. Parenting children with intellectual disabilities in Malawi: The impact that reaches beyond coping? *Child Care Health Dev*. 2016; 42(6):871–80. <https://doi.org/10.1111/cch.12368> PMID: 27416799

9. Kaya K, Unsal-Delialioglu S, Ordu-Gokkaya NK, Ozisler Z, Ergun N, Ozel S, et al. Musculo-skeletal pain, quality of life and depression in mothers of children with cerebral palsy. *Disability and Rehabilitation*. 2010; 32(20):1666–72. <https://doi.org/10.3109/09638281003649912> PMID: 20170278
10. Ntinda K, Hlanze B. Lived Experiences of Parents of Children with Disabilities in Swaziland. *Journal of Education and Training Studies*. 2015; 3(4):206–15.
11. Raina P, O'Donnell M, Schwellnus H, Rosenbaum P, King G, Brehaut J, et al. Caregiving process and caregiver burden: conceptual models to guide research and practice. *BMC pediatrics*. 2004; 4(1):1–13. <https://doi.org/10.1186/1471-2431-4-1> PMID: 14723791
12. Gorter JW, Ketelaar M, Rosenbaum P, Hadders PJ, Palisano R. Use of the GMFCS in infants with CP: the need for reclassification at age 2 years or older. *Developmental Medicine & Child Neurology*. 2009; 51(1):46–52.
13. Ones K, Yilmaz E, Cetinkaya B, Caglar N. Assessment of the quality of life of mothers of children with cerebral palsy (primary caregivers). *Neurorehabilitation and neural repair*. 2005; 19(3):232–7. <https://doi.org/10.1177/1545968305278857> PMID: 16093414
14. Prudente COM, Barbosa MA, Porto CC. Relation between quality of life of mothers of children with cerebral palsy and the children's motor functioning, after ten months of rehabilitation. *Revista Latino-Americana de Enfermagem*. 2010; 18:149–55. <https://doi.org/10.1590/s0104-11692010000200002> PMID: 20549111
15. MacDonald H, Callery P. Parenting children requiring complex care: a journey through time. *Child: care, health and development*. 2008; 34(2):207–13.
16. Wu J, Zhang J, Hong Y. Quality of life of primary caregivers of children with cerebral palsy: a comparison between mother and grandmother caregivers in Anhui province of China. *Child: care, health and development*. 2017; 43(5):718–24. <https://doi.org/10.1111/cch.12464> PMID: 28497475
17. Farajzadeh A, Maroufizadeh S, Amini M. Factors associated with quality of life among mothers of children with cerebral palsy. *International journal of nursing practice*. 2020; 26(3):e12811. <https://doi.org/10.1111/ijn.12811> PMID: 31981299
18. Ying K, Rostenberghe HV, Kuan G, Mohd Yusoff MHA, Ali SH, Yaacob NS. Health-Related Quality of Life and Family Functioning of Primary Caregivers of Children with Cerebral Palsy in Malaysia. *International journal of environmental research and public health*. 2021; 18(5). <https://doi.org/10.3390/ijerph18052351> PMID: 33670850
19. Mohammed FM, Ali SM, Mustafa MA. Quality of life of cerebral palsy patients and their caregivers: A cross sectional study in a rehabilitation center Khartoum-Sudan (2014–2015). *Journal of neurosciences in rural practice*. 2016; 7(03):355–61.
20. Pandit B, Singh JK, Karn AK, Pandit R. Quality of Life among Primary Caregivers of Children with Cerebral Palsy Living in Sarlahi and Rautahat Districts of Nepal. *Journal of Nepal Health Research Council*. 2021; 18(4):619–25. <https://doi.org/10.33314/jnhrc.v18i4.2282> PMID: 33510499
21. Xia C, Sun M, Li X, Lu C, Gao X, Lu J, et al. Health-Related Quality of Life and Related Factors among Primary Caregivers of Children with Disabilities in Shanghai, China: A Cross-Sectional Study. *International journal of environmental research and public health*. 2020; 17(24). <https://doi.org/10.3390/ijerph17249299> PMID: 33322674
22. Byrne MB, Hurley DA, Daly L, Cunningham CG. Health status of caregivers of children with cerebral palsy. *Child: care, health and development*. 2010; 36(5):696–702. <https://doi.org/10.1111/j.1365-2214.2009.01047.x> PMID: 20074250
23. Hays RD, Sherbourne CD, Mazel RM. The RAND 36-Item Health Survey 1.0. *Health economics*. 1993; 2(3):217–27. <https://doi.org/10.1002/hec.4730020305> PMID: 8275167
24. Kebede D, Alem A, Shibire T, Negash A, Deyassa N, Beyero T. Health related quality of life (SF-36) survey in Butajira, rural Ethiopia: normative data and evaluation of reliability and validity. *Ethiopian medical journal*. 2004; 42(4):289–97. PMID: 16122121
25. Polack S, Adams M, O'Banion D, Baltussen M, Asante S, Kerac M, et al. Children with cerebral palsy in Ghana: malnutrition, feeding challenges, and caregiver quality of life. *Developmental medicine and child neurology*. 2018; 60(9):914–21. <https://doi.org/10.1111/dmcn.13797> PMID: 29736993
26. Albayrak I, Biber A, Caliskan A, Levendoglu F. Assessment of pain, care burden, depression level, sleep quality, fatigue and quality of life in the mothers of children with cerebral palsy. *Journal of child health care: for professionals working with children in the hospital and community*. 2019; 23(3):483–94. <https://doi.org/10.1177/1367493519864751> PMID: 31319696
27. Tuna H, Unalan H, Tuna F, Kokino S. Quality of life of primary caregivers of children with cerebral palsy: a controlled study with Short Form-36 questionnaire. *Developmental medicine and child neurology*. 2004; 46(9):647–8. <https://doi.org/10.1017/s0012162204221077> PMID: 15344526

28. Figueiredo AA, Lomazi EA, Montenegro MA, Bellomo-Brandao MA. Quality of Life in Caregivers of Pediatric Patients with Cerebral Palsy and Gastrostomy Tube Feeding. *Arquivos de gastroenterologia*. 2020; 57(1):3–7. <https://doi.org/10.1590/S0004-2803.202000000-02> PMID: 32294728
29. Elsayed RM, Hasanein BM, Sayyah HE, El-Auoty MM, Tharwat N, Belal TM. Sleep assessment of children with cerebral palsy: Using validated sleep questionnaire. *Annals of Indian Academy of Neurology*. 2013; 16(1):62. <https://doi.org/10.4103/0972-2327.107708> PMID: 23661965
30. Wayte S, McCaughey E, Holley S, Annaz D, Hill CM. Sleep problems in children with cerebral palsy and their relationship with maternal sleep and depression. *Acta Paediatrica*. 2012; 101(6):618–23. <https://doi.org/10.1111/j.1651-2227.2012.02603.x> PMID: 22536813
31. Surender S, Gowda VK, Sanjay KS, Basavaraja GV, Benakappa N, Benakappa A. Caregiver-reported health-related quality of life of children with cerebral palsy and their families and its association with gross motor function: A South Indian study. *J Neurosci Rural Pract*. 2016; 7(2):223–7. <https://doi.org/10.4103/0976-3147.178657> PMID: 27114652
